# Supplementary material for: A solid-state chemical method for synthesizing MgO nanoparticles with superior adsorption properties
Source: Royal Society of Chemistry journal article supplement (doi:10.1039/c8ra09199d), 2019-01-01
Supplement: c8ra09199d1.pdf [file c8ra09199d1.pdf]

## A solid-state chemical means to synthesize MgO nanoparticles with superior adsorption property

Hongyu Zhang, Jindou Hu, Jing Xie, Shiqiang Wang, Yali Cao\*

*Key Laboratory of Energy Materials Chemistry, Ministry of Education, Key Laboratory of Advanced Functional Materials, Autonomous Region, Institute of Applied Chemistry, Xinjiang University, Urumqi 830046, Xinjiang, China.*

\*Corresponding author. Tel: +86-991-8583083; Fax: +86-991-8588883;

Email: caoyali523@163.com (Y.L. Cao).

**Tab. S1.** Comparison of specific surface areas about MgO.

| MgO adsorbent               | Specific surface area (m <sup>2</sup> ·g <sup>-1</sup> ) | Reference  |
|-----------------------------|----------------------------------------------------------|------------|
| MgO nanoparticles           | 213                                                      | This paper |
| Mesoporous MgO              | 151                                                      | 1          |
| Porous hierarchical MgO     | 148                                                      | 2          |
| Lamellar MgO nanostructures | 132                                                      | 3          |
| Rod-like MgO                | 115                                                      | 4          |
| MgO-GO microspheres         | 108                                                      | 5          |

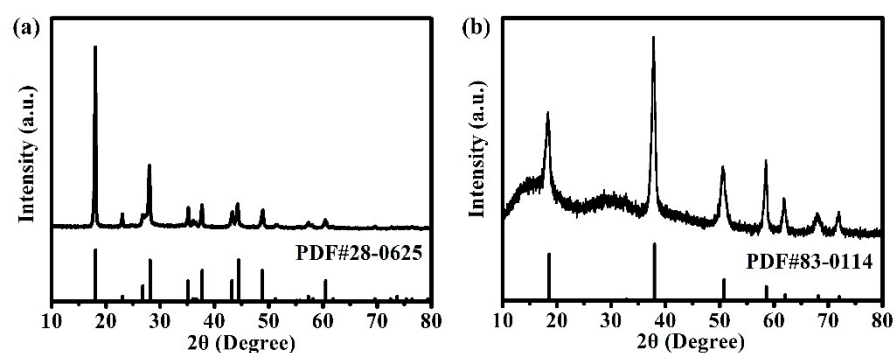

**Fig. S1.** The precursors of MgO nanoparticles synthesized with (a) H<sub>2</sub>C<sub>2</sub>O<sub>4</sub>·2H<sub>2</sub>O and (b) NaOH.

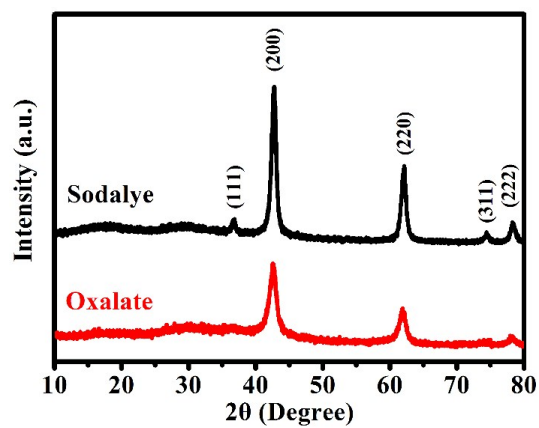

**Fig. S2.** The XRD patterns of MgO nanoparticles prepared with different materials.

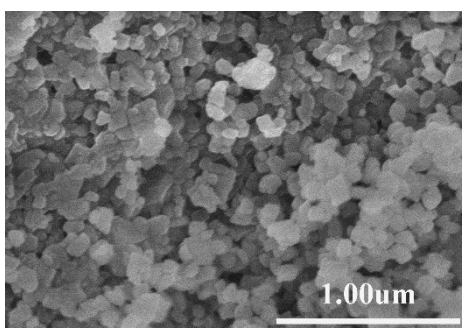

**Fig. S3.** The SEM image of  $\text{MgC}_2\text{O}_4$  prepared with  $\text{Mg}(\text{OAc})_2 \cdot 4\text{H}_2\text{O}$  and  $\text{H}_2\text{C}_2\text{O}_4 \cdot 2\text{H}_2\text{O}$ .

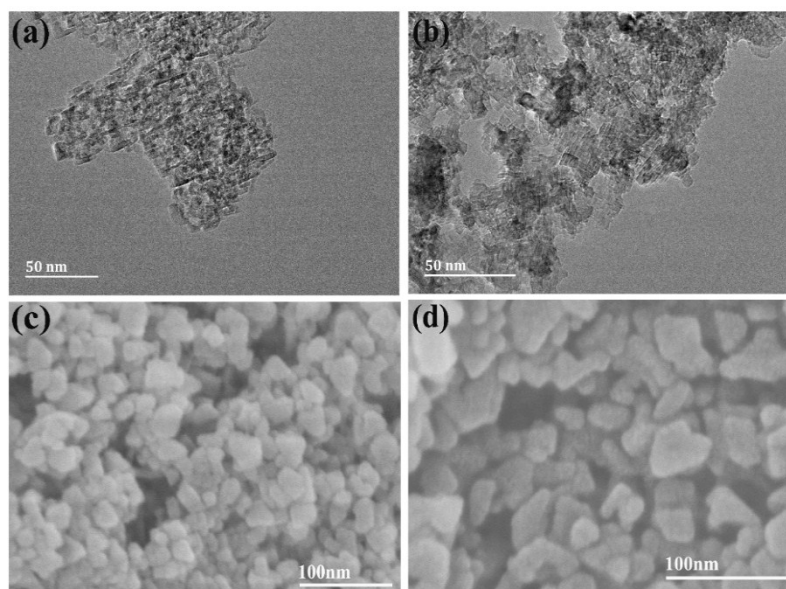

**Fig. S4.** (a) TEM and (c) SEM of MgO nanoparticles synthesized with  $\text{H}_2\text{C}_2\text{O}_4 \cdot 2\text{H}_2\text{O}$ ; (b) TEM and (d) SEM of MgO nanoparticles generated with NaOH.

**Tab. S2.** Comparison of specific surface areas about MgO fabricated with two raw materials.

| Raw material                                              | Specific surface area ( $\text{m}^2\cdot\text{g}^{-1}$ ) |
|-----------------------------------------------------------|----------------------------------------------------------|
| $\text{H}_2\text{C}_2\text{O}_4\cdot 2\text{H}_2\text{O}$ | 213                                                      |
| NaOH                                                      | 122                                                      |

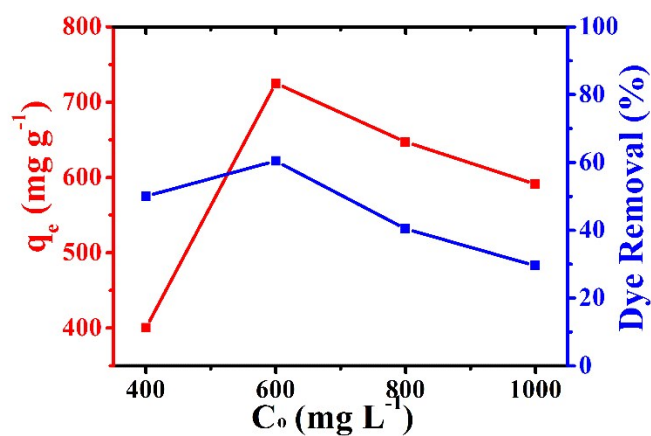

**Fig. S5.** The adsorption isotherm of the MgO nanoparticles fabricated with NaOH.

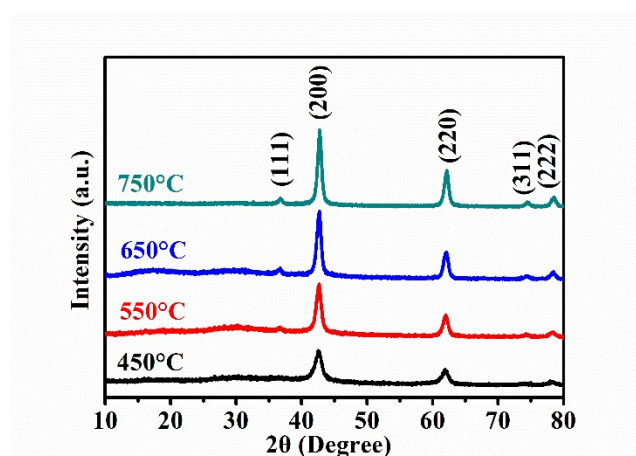

**Fig. S6.** The XRD pattern of the MgO nanoparticles acquired from calcination with different temperatures varying from 450°C to 750°C.

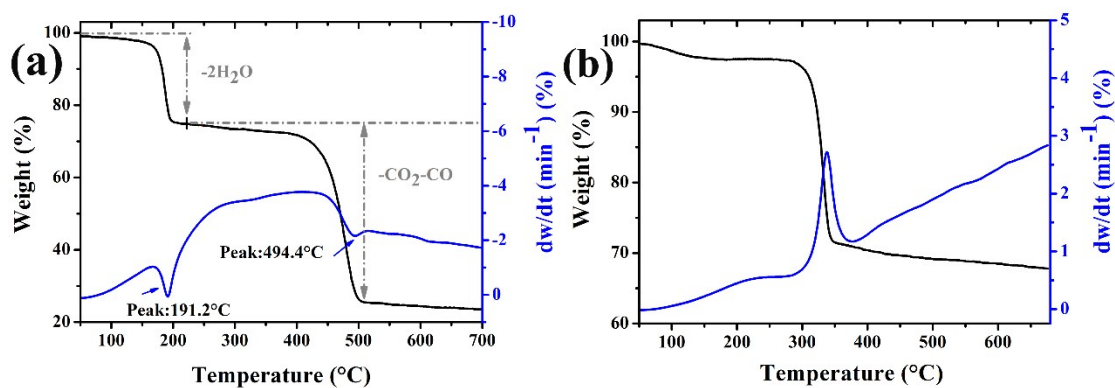

**Fig. S7.** TGA and DSC curves of the precursors synthesized with (a)  $\text{H}_2\text{C}_2\text{O}_4 \cdot 2\text{H}_2\text{O}$  and (b) NaOH.

**Tab. S3.** Comparison of specific surface areas about MgO prepared at different calcination temperatures.

| Calcination temperature | Specific surface area ( $\text{m}^2 \cdot \text{g}^{-1}$ ) |
|-------------------------|------------------------------------------------------------|
| 450°C                   | 213                                                        |
| 550°C                   | 119                                                        |
| 650°C                   | 110                                                        |
| 750°C                   | 87                                                         |

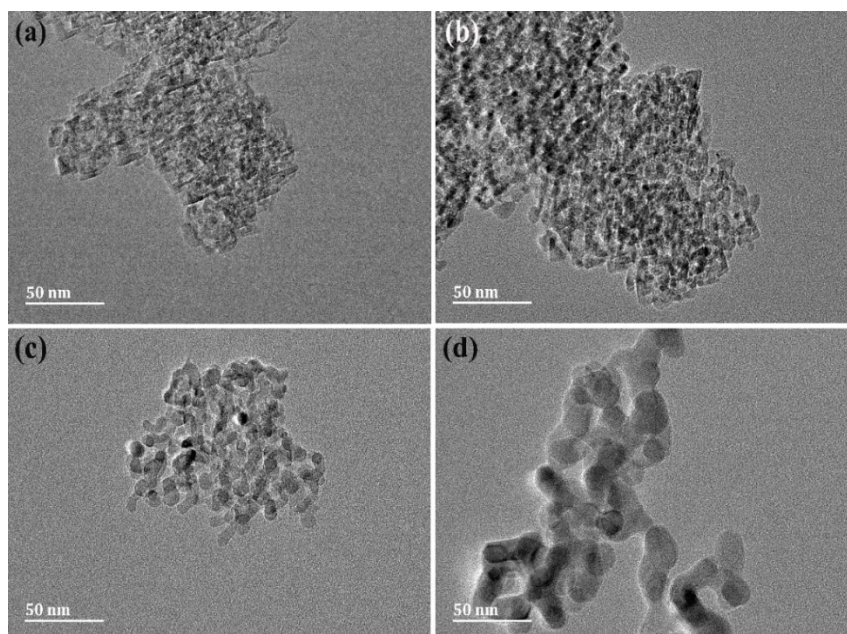

**Fig. S8.** TEM images of MgO nanoparticles acquired from calcination at (a) 450°C, (b) 550°C, (c) 650°C and (d) 750°C.

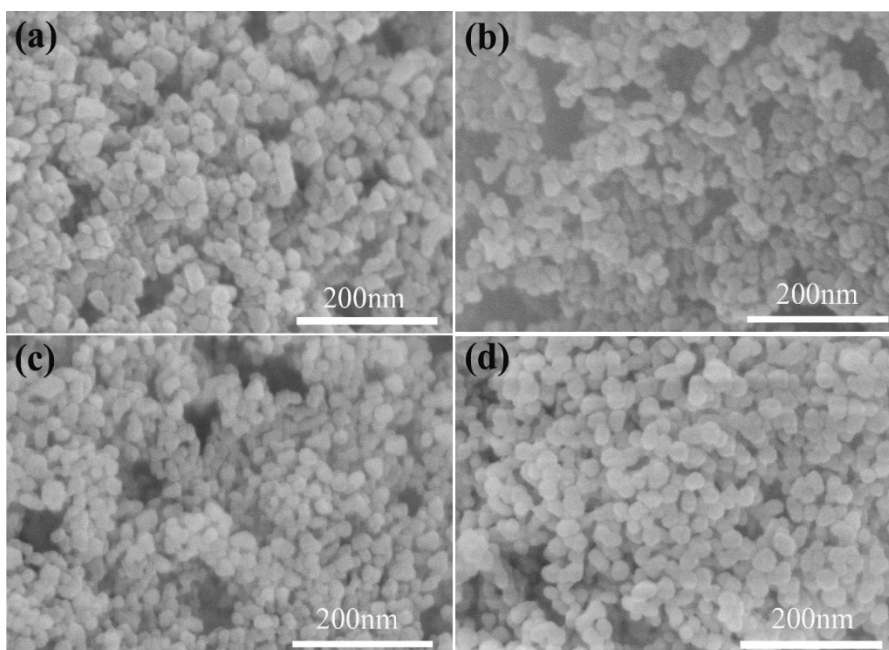

**Fig. S9.** SEM images of MgO nanoparticles acquired from calcination at (a) 450°C, (b) 550°C, (c) 650°C and (d) 750°C.

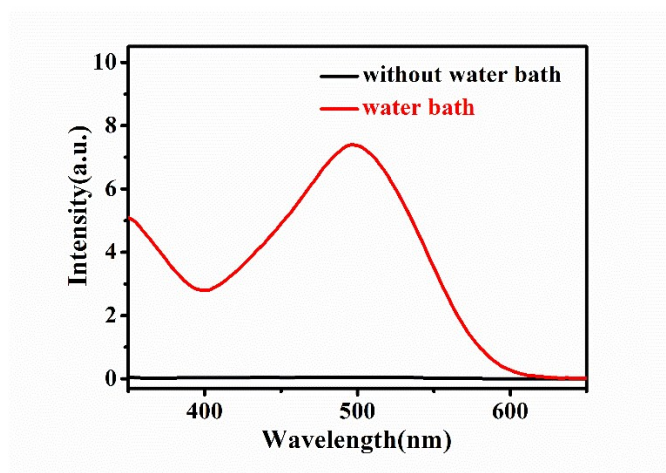

**Fig. S10.** UV-vis spectra of initial CR solutions ( $600 \text{ mg}\cdot\text{L}^{-1}$ ) of the MgO nanoparticles.

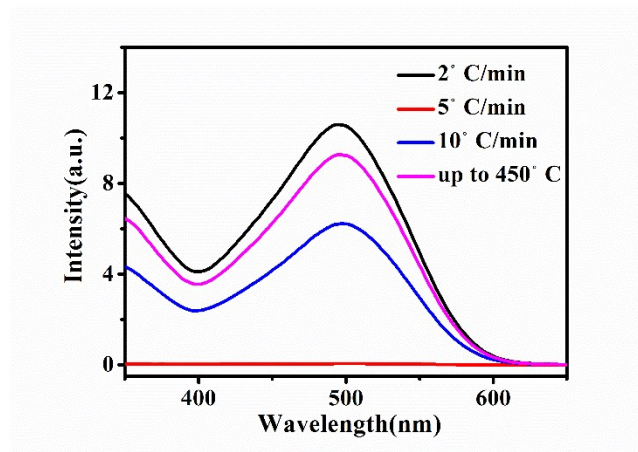

**Fig. S11.** UV-vis spectra of initial CR solutions ( $800 \text{ mg}\cdot\text{L}^{-1}$ ) of the MgO nanoparticles acquired without water bath process at different heating rates.

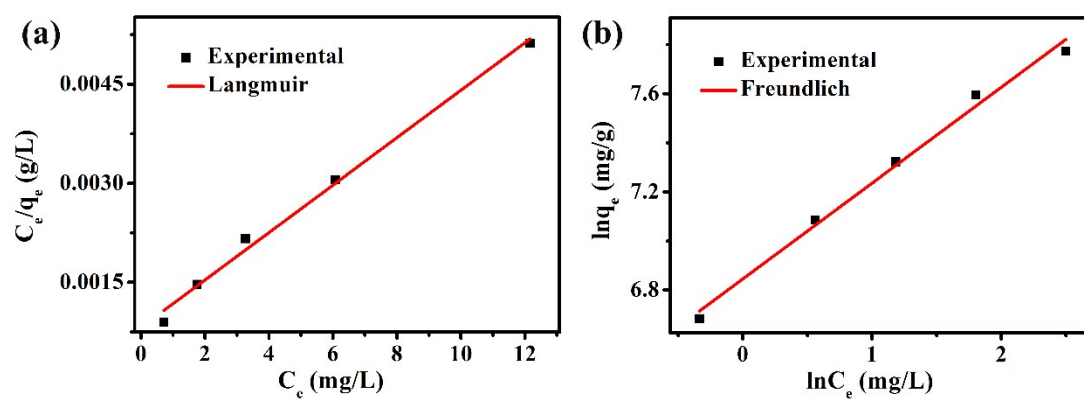

**Fig. S12.** Adsorption isotherm curves of Congo red on as-synthesized MgO nanoparticles.

**Tab. S4.** Adsorption isotherm parameters of Congo red on MgO nanoparticles.

|     | Langmuir                             |        |        | Freundlich |      |        |
|-----|--------------------------------------|--------|--------|------------|------|--------|
|     | $q_m \text{ (mg}\cdot\text{g}^{-1})$ | $b$    | $R^2$  | $K_f$      | $n$  | $R^2$  |
| MgO | 2785                                 | 0.4387 | 0.9916 | 939.35     | 2.56 | 0.9891 |

**Tab. S5.** Comparison of adsorption capacities towards CR on MgO.

| MgO adsorbent               | Adsorbent mass (mg) | Removal Capacity ( $\text{mg}\cdot\text{g}^{-1}$ ) | Reference  |
|-----------------------------|---------------------|----------------------------------------------------|------------|
| MgO mesoporous nanofibers   | 30                  | 4802                                               | 6          |
| Rod-like Si-MgO             | 10                  | 3236                                               | 7          |
| Lamellar MgO nanostructures | 50                  | 2650                                               | 3          |
| Porous hierarchical MgO     | 40                  | 2409                                               | 2          |
| MgO nanoparticles           | 10                  | 2375                                               | This paper |
| Porous MgO MoFs             | 10                  | 1413                                               | 8          |
| Hierarchical MgO            | 10                  | 1205                                               | 9          |
| Porous MgO                  | 20                  | 689                                                | 10         |
| MgO-GO microspheres         | 10                  | 237                                                | 5          |

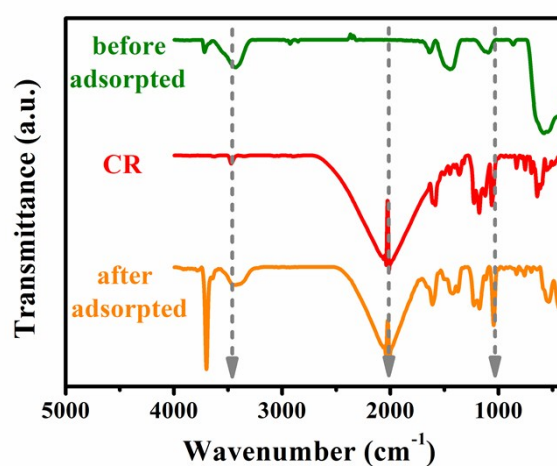

**Fig. 13.** FT-IR spectra of Congo red, MgO nanoparticles before and after adsorbed.

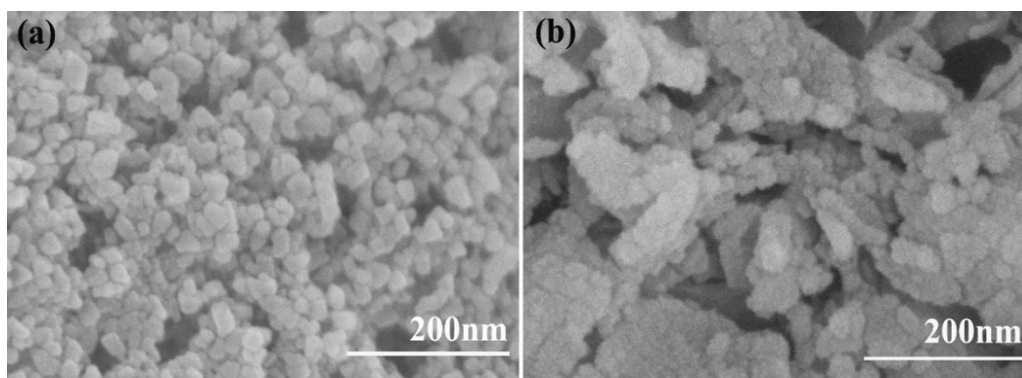

**Fig. S14.** The SEM images of (a) before reaction and (b) after reaction of the MgO nanoparticles acquired without water bath process.

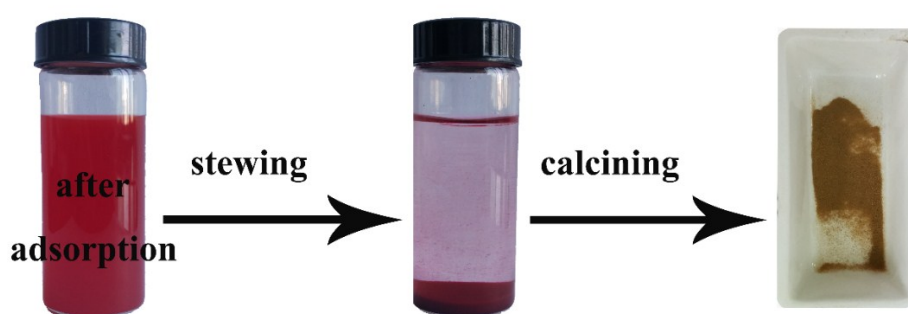

**Fig. S15.** Reusability illustration of the MgO nanoparticles without water bath process.

## References

- [1] B. Eckhardt, E. Ortel, J. Polte, D. Bernsmeier, O. Gorke, P. Strasser and R. Kraehnert, *Adv. Mater.*, 2012, **24**, 3115-3119.
- [2] P. Tian, X. Y. Han, G. L. Ning, H. X. Fang, J. W. Ye, W. T. Gong and Y. Lin, *ACS Appl. Mater. Interf.*, 2013, **5**, 12411-12418.
- [3] X. M. Liu, C. Niu, X. P. Zhen, J. D. Wang and X. T. Su, *J. Mater. Res.*, 2015, **30**, 1639-1647.
- [4] N. Sutradhar, A. Sinhamahapatra, S. K. Pahari, P. Pal, H. C. Bajaj, I. Mukhopadhyay and A. B. Panda, *J. Phys. Chem. C*, 2011, **115**, 12308-12316.
- [5] J. Xu, D. F. Xu, B. C. Zhu, B. Cheng and C. J. Jiang, *Appl. Surf. Sci.*, 2018, **435**, 1136-1142.
- [6] Z. Q. Bai, Y. J. Zheng and Z. P. Zhang, *J. Mater. Chem. A*, 2017, **5**, 6630-6637.



- [7] Z. C. Yu, C. H. Xu, K. K. Yuan, X. Z. Gan, H. F. Zhou, X. Q. Wang, L. Y. Zhu, G. H. Zhang and D. Xu, *Ceram. Int.*, 2018, **44**, 9454-9462.
- [8] X. H. Shi, J. J. Ban, L. Zhang, Z. P. Sun, D. Z. Jia and G. C. Xu, *RSC Adv.*, 2017, **7**, 16189-16195.
- [9] J. P. Dhal; M. Sethi, B. G. Mishra, G. Hota, *Mater. Lett.*, 2015, **141**, 267-271.
- [10] L. H. Ai, H. T. Yue and J. Jiang, *Nanoscale*, 2012, **4**, 5401-5408.
